# Supplementary material for: RNA Viral Metagenome Analysis of Subnanogram dsRNA Using Fragmented and Primer Ligated dsRNA Sequencing (FLDS)
Source: PubMed Central journal article supplement (PMC8209451; doi:10.1264/jsme2.me20152), 2021-05-01
Supplement: 36_20152_s1.pdf [file 36_20152_s1.pdf]

Supplementary Data

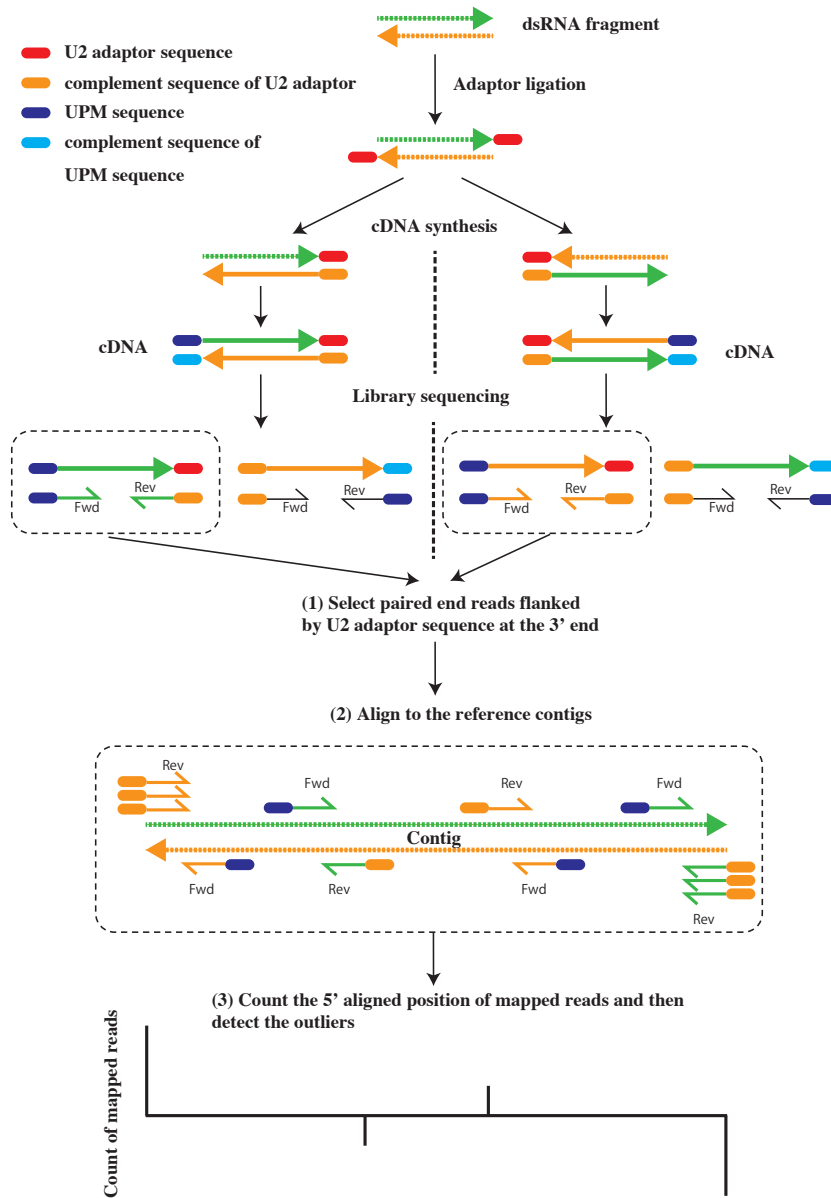

Fig. S1. Workflow for identification of terminal ends of viral genomes and genome segments.

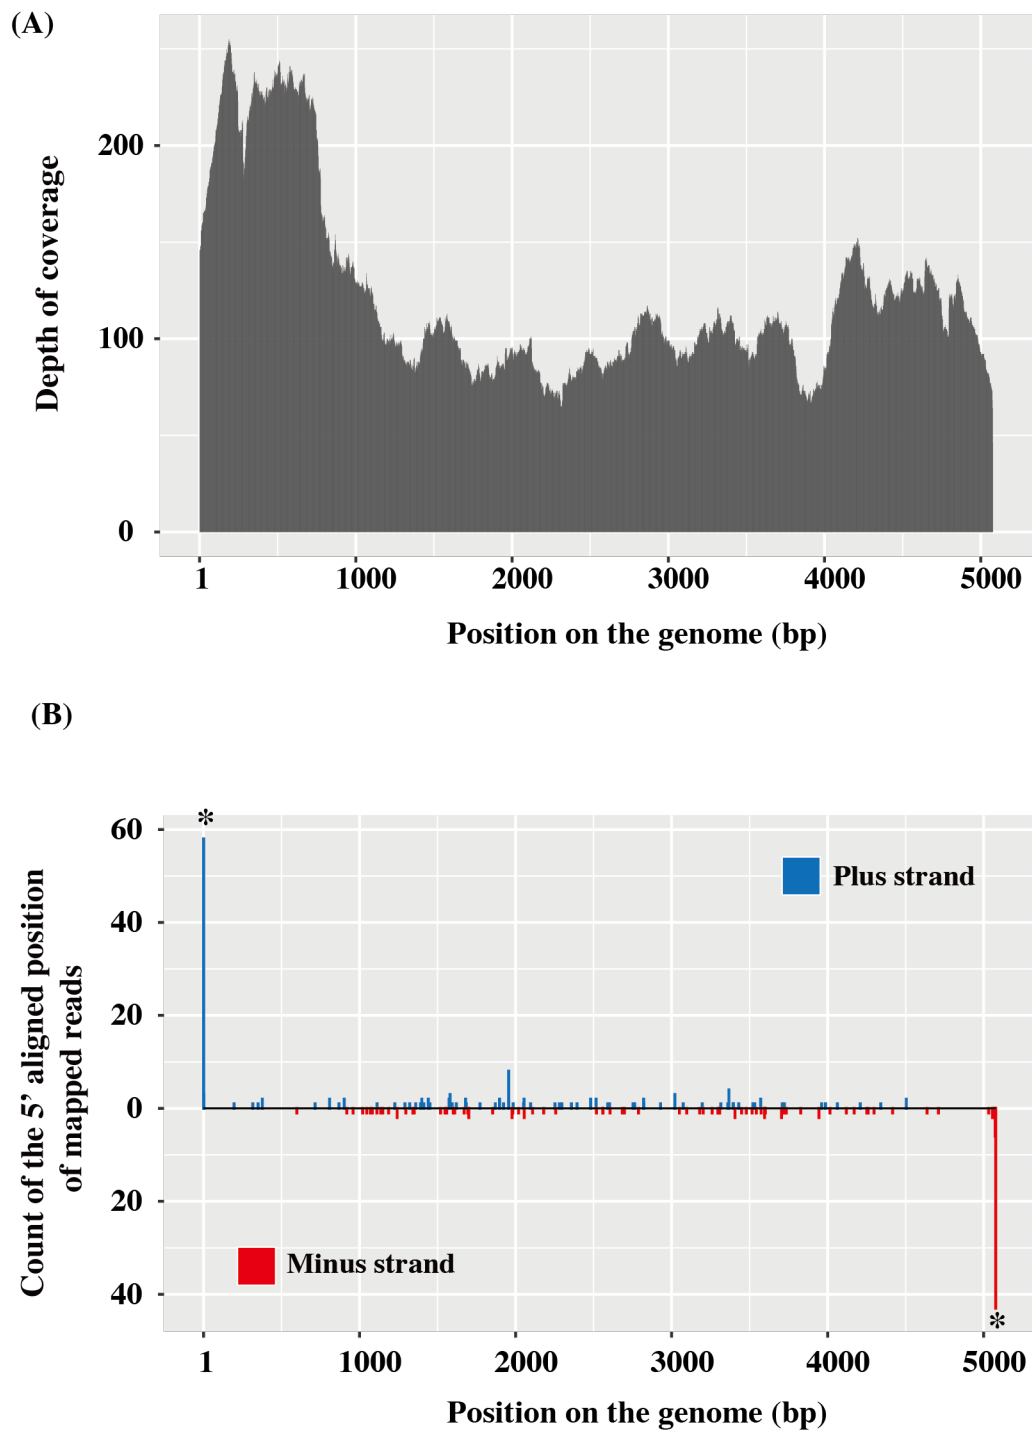

Fig. S2. Sequencing coverage of the paired-end read from a FLDS library on an RNA viral genome (A) and identification of the terminal ends of the genome sequence (B). The asterisk indicates a statistically significant difference ( $P < 0.05$ ) in the Smirnov-Grubbs test.

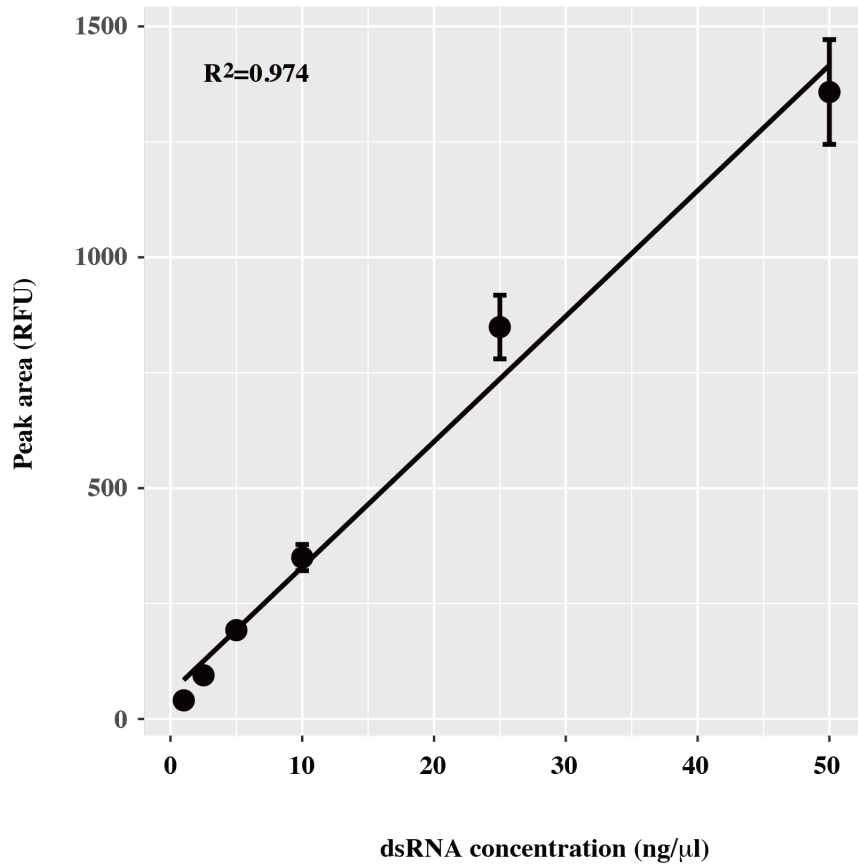

Fig. S3. Standard curve for dsRNA concentration measurements obtained using a Fragment Analyzer. The regression line is a solid black line. RFU: relative fluorescence units.

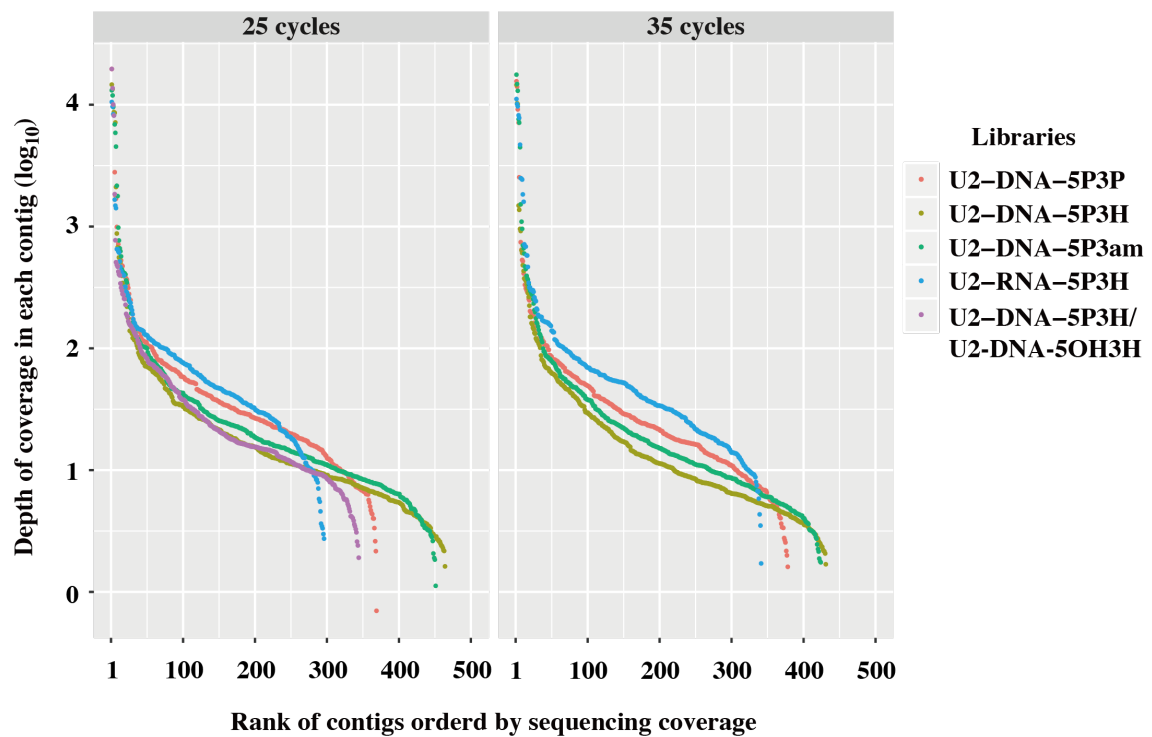

Fig. S4. Rank abundance curves based on sequencing coverage of contigs for the assemblies from the cDNA libraries constructed with 5 adaptors types. Assembly of each library was performed after removing the prokaryotic and eukaryotic reads from the normalized data set.

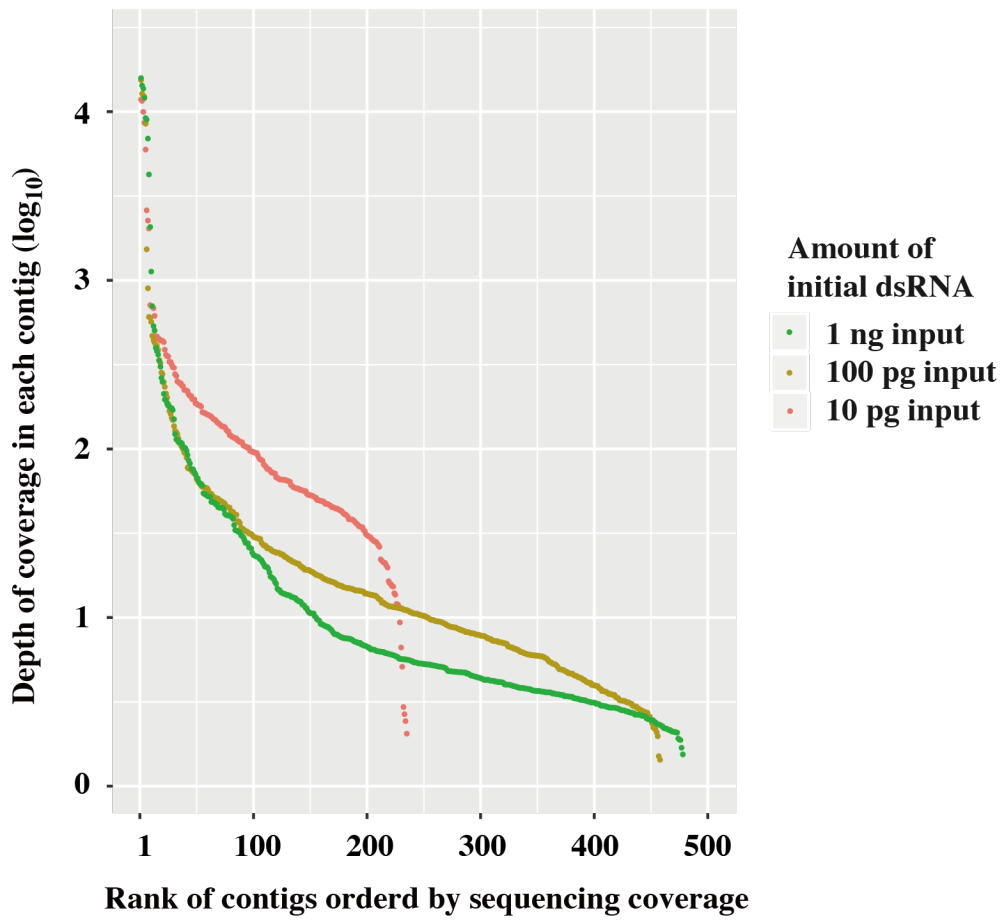

Fig. S5. Rank abundance curves from sequencing coverage of contigs for the assemblies with a various amounts of input dsRNA. Assembly of each library was preformed after removing the prokaryotic and eukaryotic reads from the normalized data set.

Table S1 Putative complete genomes of RNA viruses identified from a diatom.

| Accession no. | Length (bp) | Depth of coverage | BLASTX         |                        |         |          | Taxonomic family                                  | References                 |                |
|---------------|-------------|-------------------|----------------|------------------------|---------|----------|---------------------------------------------------|----------------------------|----------------|
|               |             |                   | accession      | gene                   | E-value | identity |                                                   |                            | organism       |
| AP014891      | 1562        | 14408             | YP_009333349.1 | RdRp                   | 5E-161  | 48       | Beihai picobima-like virus 8                      | unclassified RNA viruses   | Urayama et al. |
| AP014890      | 1734        | 10753             | YP_009333348.1 | hypothetical protein   | 2E-14   | 25       | Beihai picobima-like virus 7                      | unclassified RNA viruses   | Urayama et al. |
| AP014892      | 4026        | 10448             | QKL20127.1     | RdRp                   | 7E-29   | 30       | Conidiobolus non-segmented RNA virus 1            | unclassified dsRNA viruses | Urayama et al. |
| AP014914      | 4568        | 8624              | QKL20127.1     | RdRp                   | 4E-19   | 26       | Conidiobolus non-segmented RNA virus 1            | unclassified dsRNA viruses | Urayama et al. |
| AP014915      | 4786        | 2465              | QKL20127.1     | RdRp                   | 2E-15   | 25       | Conidiobolus non-segmented RNA virus 1            | unclassified dsRNA viruses | Urayama et al. |
| BNHM01000033  | 1572        | 1010              | no hit         |                        |         |          |                                                   |                            | This study     |
| AP014916      | 3458        | 741               | YP_007761588.1 | putative coat protein  | 4E-40   | 29       | Ustilagoidea vires RNA virus 1                    | Totiviridae                | Urayama et al. |
| AP014894      | 4982        | 614               | QLC27590.1     | RdRp                   | 4E-70   | 35       | Erysiphe necator associated totivirus 1           | Totiviridae                | Urayama et al. |
| AP014910      | 5907        | 601               | YP_009333150.1 | hypothetical protein 2 | 8E-107  | 34       | Beihai bamae-like virus 15                        | unclassified RNA viruses   | Urayama et al. |
| AP014896      | 5252        | 437               | YP_009508249.1 | RdRp                   | 4E-74   | 32       | Aspergillus foetidus slow virus                   | Totiviridae                | Urayama et al. |
| AP014920      | 1986        | 424               | BCD56390.1     | RdRp                   | 3E-66   | 33       | Lichen partiti-like RNA virus                     | Partitiviridae             | Urayama et al. |
| BNHM01000034  | 2040        | 415               | no hit         |                        |         |          |                                                   |                            | This study     |
| AP014909      | 6635        | 384               | ANR02704.1     | RdRp                   | 4E-13   | 29       | Rhizoctonia solani mycovirus                      | unclassified viruses       | Urayama et al. |
| BNHM01000010  | 4909        | 346               | VFI65724.1     | RdRp                   | 7E-70   | 30       | Umberlopsi ramanniana virus                       | Totiviridae                | This study     |
| BNHM01000031  | 1863        | 334               | no hit         |                        |         |          |                                                   |                            | This study     |
| AP014893      | 4911        | 320               | VFI65724.1     | RdRp                   | 1E-70   | 31       | Umberlopsi ramanniana virus                       | Totiviridae                | Urayama et al. |
| BNHM01000035  | 1092        | 282               | no hit         |                        |         |          |                                                   |                            | This study     |
| AP014911      | 5909        | 233               | YP_009333150.1 | hypothetical protein 2 | 5E-101  | 34       | Beihai bamae-like virus 15                        | unclassified RNA viruses   | Urayama et al. |
| AP014897      | 4939        | 209               | BBZ90082.1     | RdRp                   | 3E-73   | 31       | Red algae totivirus 1                             | Totiviridae                | Urayama et al. |
| AP014917      | 3190        | 182               | BBZ90080.1     | RdRp                   | 0       | 46       | Diatom totivirus 1                                | Totiviridae                | Urayama et al. |
| AP014919      | 3325        | 165               | AZT88631.1     | RdRp                   | 2E-114  | 32       | Colletotrichum caudatum totivirus 1               | Totiviridae                | Urayama et al. |
| AP014900      | 4844        | 155               | AZT88635.1     | RdRp                   | 1E-67   | 34       | Colletotrichum navitas                            | Totiviridae                | Urayama et al. |
| BNHM01000013  | 4370        | 148               | no hit         |                        |         |          |                                                   |                            | This study     |
| BNHM01000008  | 5251        | 141               | BBZ90080.1     | RdRp                   | 1E-73   | 35       | Diatom totivirus 1                                | Totiviridae                | This study     |
| AP014918      | 3262        | 133               | YP_009143306.1 | putative coat protein  | 3E-47   | 28       | Magnaporthe oryzae virus 3                        | Totiviridae                | Urayama et al. |
| AP014899      | 4660        | 133               | YP_009182167.1 | RdRp                   | 7E-67   | 30       | Ustilagoidea vires RNA virus 5                    | Totiviridae                | Urayama et al. |
| AP014903      | 5160        | 128               | BBZ90080.1     | RdRp                   | 2E-134  | 35       | Diatom totivirus 1                                | Totiviridae                | Urayama et al. |
| AP014913      | 4586        | 120               | AEP83726.1     | RdRp                   | 2E-19   | 31       | Tuber excavatum mitovirus                         | Mitoviridae                | Urayama et al. |
| BNHM01000021  | 3463        | 114               | QKL20127.1     | RdRp                   | 1E-24   | 31       | Conidiobolus non-segmented RNA virus 1            | unclassified dsRNA viruses | This study     |
| BNHM01000016  | 3392        | 106               | no hit         |                        |         |          |                                                   |                            | This study     |
| AP014898      | 5327        | 100               | NP_624332.2    | RdRp                   | 8E-120  | 36       | Gremmeniella abietina RNA virus L1                | Totiviridae                | Urayama et al. |
| BNHM01000028  | 2317        | 100               | no hit         |                        |         |          |                                                   |                            | This study     |
| BNHM01000018  | 3468        | 89                | no hit         |                        |         |          |                                                   |                            | This study     |
| AP014902      | 5082        | 86                | BBZ90080.1     | RdRp                   | 6E-140  | 35       | Diatom totivirus 1                                | Totiviridae                | Urayama et al. |
| AP014905      | 4671        | 85                | VFI65724.1     | RdRp                   | 4E-66   | 33       | Umberlopsi ramanniana virus                       | Totiviridae                | Urayama et al. |
| AP014907      | 1490        | 83                | ASM94044.1     | putative capsid        | 3E-110  | 49       | Barns Ness breadcrumb sponge partiti-like virus 1 | Partitiviridae             | Urayama et al. |
| BNHM01000007  | 5326        | 82                | NP_624332.2    | RdRp                   | 7E-119  | 37       | Gremmeniella abietina RNA virus L1                | Totiviridae                | This study     |
| BNHM01000029  | 1956        | 81                | no hit         |                        |         |          |                                                   |                            | This study     |
| AP014906      | 1576        | 79                | QBC66121.1     | RdRp                   | 2E-98   | 41       | Cucumis melo cryptic virus                        | Partitiviridae             | Urayama et al. |
| AP014904      | 5941        | 78                | VFI65724.1     | RdRp                   | 3E-45   | 26       | Umberlopsi ramanniana virus                       | Totiviridae                | Urayama et al. |
| AP014908      | 12940       | 77                | AZO92732.1     | polyprotein            | 2E-140  | 24       | Arthrocladiella mougeotii alphaendovirus          | Endomaviridae              | Urayama et al. |
| BNHM01000015  | 3565        | 76                | NP_047557.1    | coat protein           | 7E-32   | 26       | Sphaeropsis sapinea RNA virus 1                   | Totiviridae                | This study     |
| AP014895      | 4979        | 74                | YP_007761589.1 | RdRp                   | 5E-73   | 34       | Ustilagoidea vires RNA virus 1                    | Totiviridae                | Urayama et al. |
| AP014901      | 4845        | 74                | AZT88635.1     | RdRp                   | 1E-69   | 34       | Colletotrichum navitas                            | Totiviridae                | Urayama et al. |
| BNHM01000001  | 12951       | 73                | AZO92732.1     | polyprotein            | 7E-141  | 26       | Arthrocladiella mougeotii alphaendovirus          | Endomaviridae              | This study     |
| AP014912      | 11413       | 71                | QIP68012.1     | RdRp                   | 2E-84   | 30       | Bremia lactucae associated ssRNA virus 1          | unclassified ssRNA viruses | Urayama et al. |
| BNHM01000005  | 5079        | 70                | BBZ90080.1     | RdRp                   | 6E-144  | 37       | Diatom totivirus 1                                | Totiviridae                | This study     |
| BNHM01000017  | 3512        | 65                | YP_009032632.1 | coat protein           | 2E-15   | 31       | Beauveria bassiana victorivirus NZL/1980          | Totiviridae                | This study     |
| BNHM01000019  | 3169        | 60                | AZT88637.1     | RdRp                   | 1E-124  | 33       | Colletotrichum zoysiae                            | Totiviridae                | This study     |
| BNHM01000004  | 5942        | 60                | VFI65724.1     | RdRp                   | 4E-43   | 26       | Umberlopsi ramanniana virus                       | Totiviridae                | This study     |
| BNHM01000011  | 4659        | 58                | VFI65724.1     | RdRp                   | 2E-67   | 33       | Umberlopsi ramanniana virus                       | Totiviridae                | This study     |
| BNHM01000020  | 4824        | 55                | VFI65724.1     | RdRp                   | 6E-66   | 31       | Umberlopsi ramanniana virus                       | Totiviridae                | This study     |
| BNHM01000003  | 6103        | 48                | APG78191.1     | RdRp                   | 1E-17   | 27       | Beihai picobima-like virus 10                     | unclassified RNA viruses   | This study     |
| BNHM01000002  | 7161        | 46                | AJE29745.1     | RdRp                   | 5E-66   | 31       | Rhizoctonia fumigata                              | unclassified viruses       | This study     |
| BNHM01000012  | 5910        | 44                | YP_009333150.1 | hypothetical protein 2 | 2E-98   | 32       | Beihai bamae-like virus 15                        | unclassified RNA viruses   | This study     |
| BNHM01000024  | 3071        | 41                | no hit         |                        |         |          |                                                   |                            | This study     |
| BNHM01000014  | 6135        | 41                | QGA70930.1     | RdRp                   | 4E-106  | 32       | Ahus virus                                        | Totiviridae                | This study     |
| BNHM01000009  | 4907        | 38                | YP_009272905.1 | RdRp                   | 1E-74   | 34       | Fusarium poae victorivirus 1                      | Totiviridae                | This study     |
| BNHM01000006  | 14823       | 36                | QIP68012.1     | RdRp                   | 6E-143  | 28       | Bremia lactucae associated ssRNA virus 1          | unclassified ssRNA viruses | This study     |
| BNHM01000023  | 3062        | 35                | no hit         |                        |         |          |                                                   |                            | This study     |
| BNHM01000026  | 2885        | 33                | no hit         |                        |         |          |                                                   |                            | This study     |
| BNHM01000032  | 1839        | 31                | no hit         |                        |         |          |                                                   |                            | This study     |
| BNHM01000030  | 5084        | 21                | BBZ90080.1     | RdRp                   | 6E-141  | 37       | Diatom totivirus 1                                | Totiviridae                | This study     |
| BNHM01000025  | 2884        | 21                | no hit         |                        |         |          |                                                   |                            | This study     |
| BNHM01000022  | 3119        | 20                | QIJ70073.1     | RdRp                   | 3E-121  | 31       | Swanson nama-like virus                           | Namaviridae                | This study     |
| BNHM01000027  | 2373        | 17                | no hit         |                        |         |          |                                                   |                            | This study     |
| BNHM01000036  | 6284        | 16                | APG76021.1     | hypothetical protein   | 1.0E-07 | 23       | Hubei toti-like virus 11                          | unclassified RNA viruses   | This study     |

Depth of coverage were estimated from the U2-DNA-5P3H library. Abbreviation: RdRp, RNA dependent RNA polymerase.
